# Supplementary material for: Preparation of Pickering emulsions through interfacial adsorption by soft cyclodextrin nanogels
Source: Beilstein J Org Chem. 2015 Nov 30;11:2355–64. doi: 10.3762/bjoc.11.257 (PMC4685927; doi:10.3762/bjoc.11.257)
Supplement: File 1 — Additional material. [file Beilstein_J_Org_Chem-11-2355-s001.pdf]

# **Supporting Information**

for

## **Preparation of Pickering emulsions through interfacial adsorption by soft cyclodextrin nanogels**

Shintaro Kawano<sup>1</sup>, Toshiyuki Kida<sup>\*2</sup>, Mitsuru Akashi<sup>2</sup>, Hirofumi Sato<sup>1</sup>, Motohiro  
Shizuma<sup>1</sup> and Daisuke Ono<sup>\*1</sup>

Address: <sup>1</sup>Biomaterial and Commodity Chemicals Research Division, Osaka  
Municipal Technical Research Institute, 1-6-50 Morinomiya, Joto-ku, Osaka  
536-8553, Japan and <sup>2</sup>Department of Applied Chemistry, Graduate School of  
Engineering, Osaka University, Suita, Osaka 565-0871, Japan

Email: Toshiyuki Kida - kida@chem.eng.osaka-u.ac.jp; Daisuke Ono -

Daikono@omtri.or.jp,

\* Corresponding author

## **Additional material**

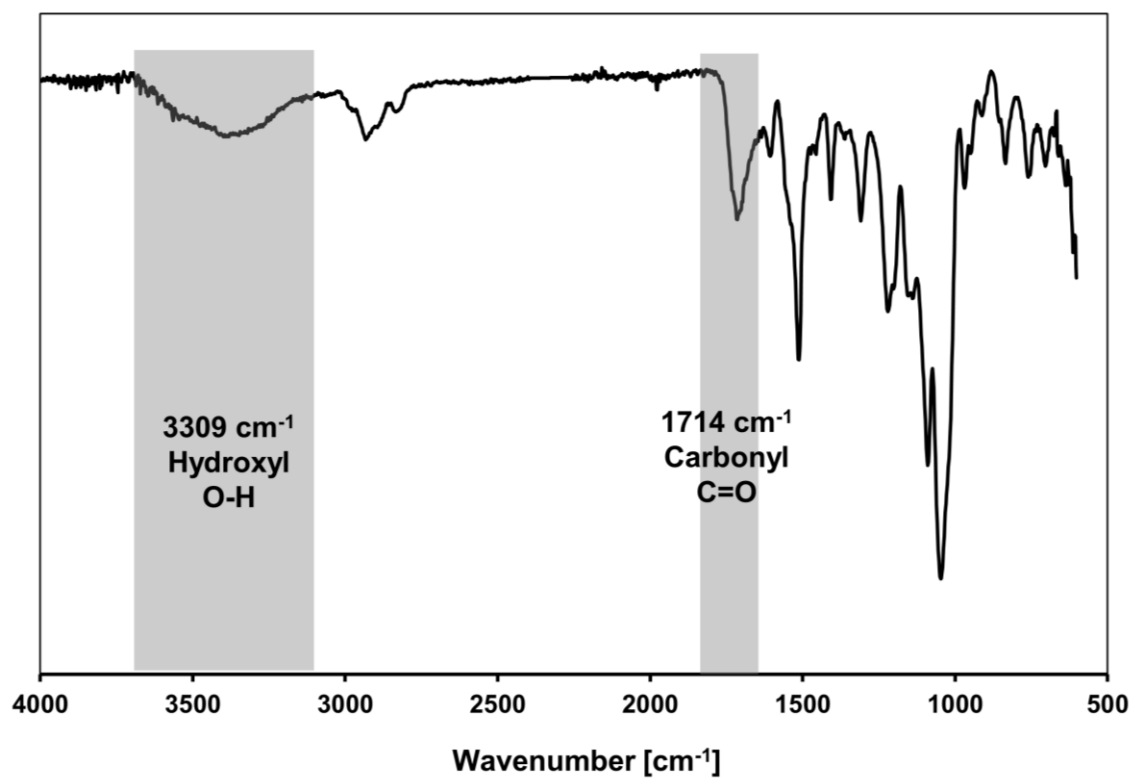

**Figure S1:** FTIR spectrum of DM-β-CD/PDI polymer.

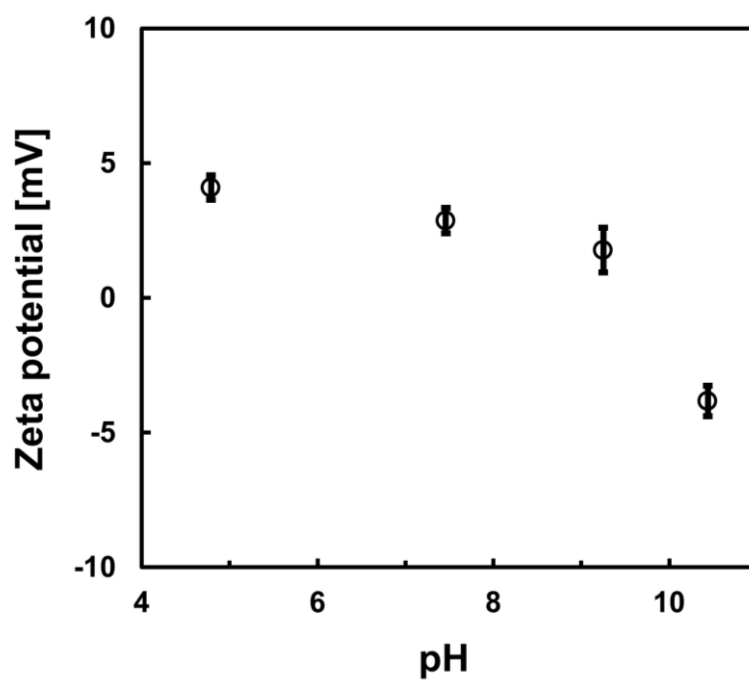

**Figure S2:** Zeta potential of DM-β-CD/PDI nanogels at various pH levels.

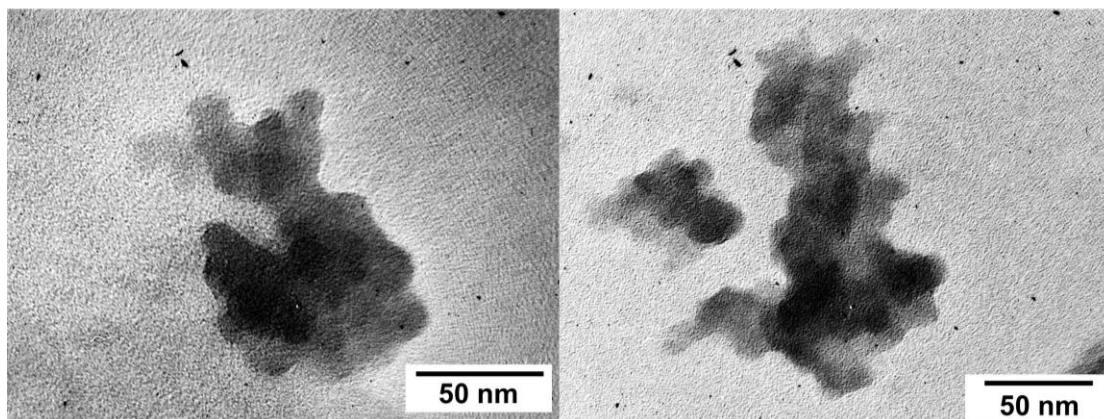

**Figure S3:** TEM images of self-assembled DM- $\beta$ -CD/PDI nanogels.

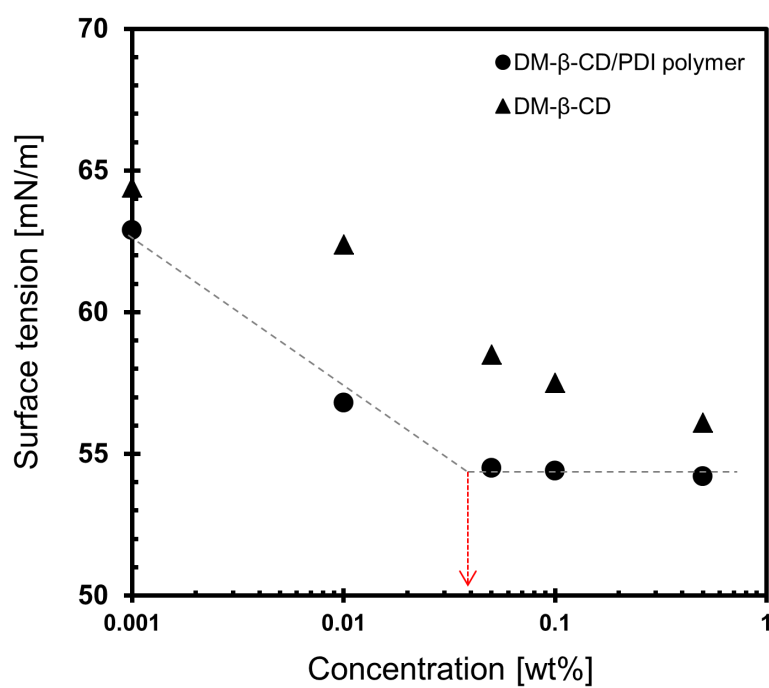

**Figure S4:** Surface tension vs concentration plots of DM- $\beta$ -CD/PDI polymer and DM- $\beta$ -CD aqueous solutions. The arrow shows a critical aggregation concentration of DM- $\beta$ -CD/PDI polymer solution.

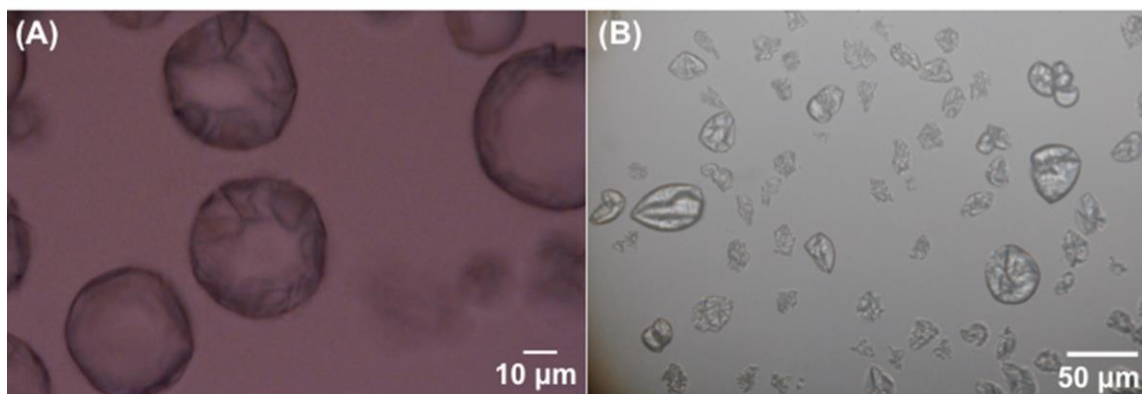

**Figure S5:** Optical micrograph of the toluene-in-water emulsion stabilized by DM-β-CD/PDI nanogel after the partial removal (A) and evaporation (B) of toluene core.

**Table S1:**  $^1\text{H}$  NMR chemical shifts ( $\delta$ ; ppm), integral values and coupling constants ( $J$ ; Hz) of DM- $\beta$ -CD/PDI polymer and DM- $\beta$ -CD in  $(\text{CD}_3)_2\text{SO}$ .

| $\delta$           | DM- $\beta$ -CD/PDI polymer |          |          | DM- $\beta$ -CD      |          |                        |
|--------------------|-----------------------------|----------|----------|----------------------|----------|------------------------|
|                    | Chemical shift (ppm)        | Integral | coupling | Chemical shift (ppm) | Integral | coupling               |
| H <sub>1</sub>     | 4.99                        | 1H       | br       | 4.97                 | 1H       | m, $J_{1,2} = 4.1$ Hz  |
| H <sub>2</sub>     | 3.21                        | 1H       | br       | 3.19                 | 1H       | dd, $J_{2,3} = 9.6$ Hz |
| H <sub>3</sub>     | 3.72                        | 1H       | br       | 3.70                 | 1H       | t, $J_{3,4} = 9.6$ Hz  |
| H <sub>4</sub>     | 3.3 <sup>a</sup>            | –        |          | 3.35 <sup>a</sup>    | 1H       | m                      |
| H <sub>5</sub>     | 3.54                        | 1H       | br       | 3.68                 | 1H       | m                      |
| H <sub>6</sub>     | 3.46                        | 2H       | br       | 3.55                 | 2H       | m                      |
| 2-OCH <sub>3</sub> | 3.3 <sup>a</sup>            | –        |          | 3.50                 | 3H       | s                      |
| 6-OCH <sub>3</sub> | 3.22                        | 3H       | br       | 3.25                 | 3H       | s                      |
| phenyl             | 7.31                        | 4H       | br       | –                    | –        | –                      |

<sup>a</sup>The signals were overlapped with H<sub>2</sub>O.
